# Supplementary material for: Surgical phase and instrument recognition: how to identify appropriate dataset splits
Source: Springer Nature journal article supplement (doi:10.1007/s11548-024-03063-9), 2024-01-29
Supplement: MOESM1 [file 26674158]

# Surgical Phase and Instrument Recognition: How to identify appropriate Dataset Splits (Supplementary Information)

Georgii Kostiuchik<sup>1,2\*</sup>, Lalith Sharan<sup>1,2</sup>, Benedikt Mayer<sup>3</sup>, Ivo  
Wolf<sup>4</sup>, Bernhard Preim<sup>3</sup> and Sandy Engelhardt<sup>1,2</sup>

<sup>1</sup>Department of Cardiac Surgery, Heidelberg University Hospital,  
Heidelberg, Germany.

<sup>2</sup>DZHK (German Centre for Cardiovascular Research), partner  
site Heidelberg/Mannheim, Germany.

<sup>3</sup>Department of Simulation and Graphics, University of  
Magdeburg, Magdeburg, Germany.

<sup>4</sup>Department of Computer Science, Mannheim University of  
Applied Sciences, Mannheim, Germany.

\*Corresponding author(s). E-mail(s):  
[georgii.kostiuchik@med.uni-heidelberg.de](mailto:georgii.kostiuchik@med.uni-heidelberg.de);

# 1 User study

The following Table 1 shows tasks from the user study of the presented visualization framework.

**Table 1** List of tasks to be solved by study participants using the visualization framework.

| ID  | Description                                                      |
|-----|------------------------------------------------------------------|
| T1  | Which phase has the most frames?                                 |
| T2  | Which two phases have the largest proportion of idle frames?     |
| T3  | Which instruments co-occur with the Clipper?                     |
| T4  | Which phase is not represented in all dataset splits?            |
| T5  | Which phases are not present in all surgeries?                   |
| T6  | Which phase transitions are not present in the training set?     |
| T7  | In which phase are the Scissors used most often?                 |
| T8  | Which surgeries end in the Cleaning coagulation phase?           |
| T9  | Which instrument combination is not present in the training set? |
| T10 | In which phase do Bipolar, Irrigator and SpecimenBag co-occur?   |

Table 2 shows the dataset split of the Cholec80 dataset that has been used in the user study.

**Table 2** Split of the Cholec80 dataset that was used in the user study.

| Set        | File IDs                                                                                                                                                                                                                          |
|------------|-----------------------------------------------------------------------------------------------------------------------------------------------------------------------------------------------------------------------------------|
| Training   | 1, 2, 3, 4, 5, 6, 7, 8, 9, 11, 12, 14, 15, 16, 18, 20, 21, 24, 25, 26, 27, 28, 30, 31, 34, 35, 39, 40, 42, 43, 44, 45, 46, 47, 48, 49, 50, 51, 52, 53, 54, 55, 56, 58, 59, 61, 62, 63, 65, 67, 68, 69, 71, 72, 73, 75, 76, 77, 80 |
| Validation | 17, 36, 37, 41, 57, 60, 64, 66, 70, 74, 78, 79                                                                                                                                                                                    |
| Test       | 10, 13, 19, 22, 23, 29, 32, 33, 38                                                                                                                                                                                                |

Three statements from the SUS questionnaire that received the most positive rating.

- Q4: I think that I would need the support of a technical person to be able to use this system (mean 1.2)
- Q5: I found the various functions in this system were well integrated (mean 4.5)
- Q6: I thought there was too much inconsistency in this system (mean 1.4)

Conversely, we report three statements that were rated least favorably.

- Q3: I thought the system was easy to use (mean 3.9)
- Q7: I would imagine that most people would learn to use this system very quickly (mean 3.9)
- Q10: I needed to learn a lot of things before I could get going with this system (mean 2.1)

Figure 1 shows the user study results for each task. Overall, the majority of the tasks were completed successfully by  $\geq 80\%$  of participants. The tasks T2 and T6 represent exceptions with the overall worst completion rate, solved correctly by 30% and 40% of participants respectively.

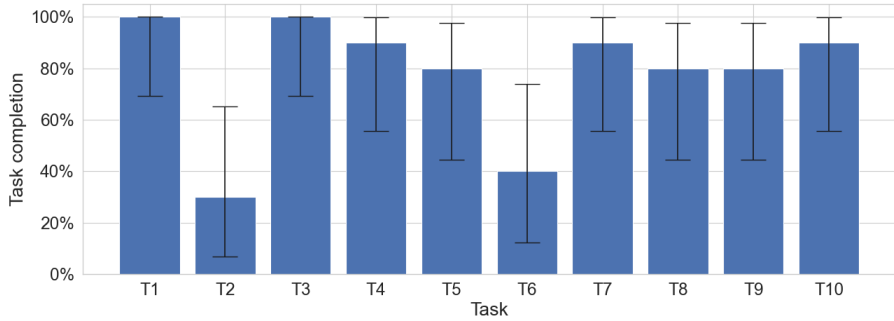

**Fig. 1** Overall task completion percentage with the corresponding 95%-confidence intervals.

## 2 Instrument co-occurrences

The following Tables 3, 4, 5, 6, 7, 8 provide detailed information on instrument co-occurrences in different datasets and splits.

**Table 3** Number of frames for each instrument co-occurrence of the Cholec80 dataset with the 40/-/40 split.

| Instrument combination           | Training | Test  |
|----------------------------------|----------|-------|
| Grasper, Hook                    | 33187    | 24258 |
| Grasper, Irrigator               | 2089     | 1379  |
| Grasper, Bipolar                 | 1552     | 1857  |
| Grasper, Clipper                 | 2172     | 1150  |
| Grasper, Scissors                | 979      | 681   |
| Grasper, SpecimenBag             | 3541     | 4031  |
| Grasper, Bipolar, Irrigator      | 503      | 154   |
| Bipolar, Irrigator               | 229      | 275   |
| Bipolar, SpecimenBag             | 127      | 121   |
| Grasper, Bipolar, SpecimenBag    | 339      | 145   |
| Irrigator, SpecimenBag           | 292      | 193   |
| Bipolar, Irrigator, SpecimenBag  | 195      | 81    |
| Grasper, Irrigator, SpecimenBag  | 533      | 242   |
| Grasper, Clipper, Irrigator      | 12       | 0     |
| Clipper, Irrigator               | 4        | 0     |
| Grasper, Clipper, SpecimenBag    | 1        | 0     |
| Grasper, Scissors, SpecimenBag   | 28       | 4     |
| Hook, Irrigator                  | 57       | 474   |
| Grasper, Hook, Irrigator         | 136      | 64    |
| Bipolar, Scissors                | 76       | 0     |
| Grasper, Hook, SpecimenBag       | 0        | 42    |
| Hook, SpecimenBag                | 0        | 1     |
| Scissors, Irrigator, SpecimenBag | 0        | 1     |
| Grasper, Scissors, Irrigator     | 0        | 2     |

**Table 4** Number of frames for each instrument co-occurrence of the Cholec80 dataset with the 32/8/40 split.

| Instrument combination           | Training | Validation | Test  |
|----------------------------------|----------|------------|-------|
| Grasper, Hook                    | 26942    | 6245       | 24258 |
| Grasper, Irrigator               | 1665     | 424        | 1379  |
| Grasper, Bipolar                 | 1290     | 262        | 1857  |
| Grasper, Clipper                 | 1595     | 577        | 1150  |
| Grasper, Scissors                | 788      | 191        | 681   |
| Grasper, SpecimenBag             | 2904     | 637        | 4031  |
| Grasper, Bipolar, Irrigator      | 503      | 0          | 154   |
| Bipolar, Irrigator               | 229      | 0          | 275   |
| Bipolar, SpecimenBag             | 120      | 7          | 121   |
| Grasper, Bipolar, SpecimenBag    | 287      | 52         | 145   |
| Irrigator, SpecimenBag           | 281      | 11         | 193   |
| Bipolar, Irrigator, SpecimenBag  | 195      | 0          | 81    |
| Grasper, Irrigator, SpecimenBag  | 448      | 85         | 242   |
| Grasper, Clipper, Irrigator      | 12       | 0          | 0     |
| Clipper, Irrigator               | 4        | 0          | 0     |
| Grasper, Clipper, SpecimenBag    | 1        | 0          | 0     |
| Grasper, Scissors, SpecimenBag   | 28       | 0          | 4     |
| Hook, Irrigator                  | 57       | 0          | 474   |
| Grasper, Hook, Irrigator         | 136      | 0          | 64    |
| Bipolar, Scissors                | 76       | 0          | 0     |
| Grasper, Hook, SpecimenBag       | 0        | 0          | 42    |
| Hook, SpecimenBag                | 0        | 0          | 1     |
| Scissors, Irrigator, SpecimenBag | 0        | 0          | 1     |
| Grasper, Scissors, Irrigator     | 0        | 0          | 2     |

6 *How to identify appropriate Dataset Splits***Table 5** Number of frames for each instrument co-occurrence of the Cholec80 dataset with the 40/8/32 split.

| Instrument combination           | Training | Validation | Test  |
|----------------------------------|----------|------------|-------|
| Grasper, Hook                    | 33187    | 5765       | 18493 |
| Grasper, Irrigator               | 2089     | 309        | 1070  |
| Grasper, Bipolar                 | 1552     | 415        | 1442  |
| Grasper, Clipper                 | 2172     | 321        | 829   |
| Grasper, Scissors                | 979      | 232        | 449   |
| Grasper, SpecimenBag             | 3541     | 965        | 3066  |
| Grasper, Bipolar, Irrigator      | 503      | 47         | 107   |
| Bipolar, Irrigator               | 229      | 66         | 209   |
| Bipolar, SpecimenBag             | 127      | 15         | 106   |
| Grasper, Bipolar, SpecimenBag    | 339      | 9          | 136   |
| Irrigator, SpecimenBag           | 292      | 47         | 146   |
| Bipolar, Irrigator, SpecimenBag  | 195      | 4          | 77    |
| Grasper, Irrigator, SpecimenBag  | 533      | 39         | 203   |
| Grasper, Clipper, Irrigator      | 12       | 0          | 0     |
| Clipper, Irrigator               | 4        | 0          | 0     |
| Grasper, Clipper, SpecimenBag    | 1        | 0          | 0     |
| Grasper, Scissors, SpecimenBag   | 28       | 0          | 4     |
| Hook, Irrigator                  | 57       | 474        | 0     |
| Grasper, Hook, Irrigator         | 136      | 64         | 0     |
| Bipolar, Scissors                | 76       | 0          | 0     |
| Grasper, Hook, SpecimenBag       | 0        | 0          | 42    |
| Hook, SpecimenBag                | 0        | 0          | 1     |
| Scissors, Irrigator, SpecimenBag | 0        | 0          | 1     |
| Grasper, Scissors, Irrigator     | 0        | 0          | 2     |

**Table 6** Number of frames for each instrument co-occurrence of the CATARACTS dataset with the 25/5/20 split.

| Instrument combination                             | Training | Validation | Test |
|----------------------------------------------------|----------|------------|------|
| Bonn forceps, secondary incision knife             | 38       | 10         | 30   |
| phacoemulsifier handpiece, micromanipulator        | 1977     | 326        | 1754 |
| irrigation/aspiration handpiece, micromanipulator  | 256      | 69         | 469  |
| biomarker, Mendez ring                             | 0        | 1          | 0    |
| Bonn forceps, primary incision knife               | 43       | 11         | 27   |
| vitrectomy handpiece, micromanipulator             | 280      | 0          | 59   |
| Bonn forceps, implant injector                     | 0        | 1          | 3    |
| viscoelastic cannula, micromanipulator             | 52       | 0          | 12   |
| hydrodissection canula, micromanipulator           | 4        | 0          | 3    |
| Bonn forceps, Troutman forceps                     | 0        | 0          | 1    |
| Troutman forceps, suture needle                    | 6        | 8          | 5    |
| Bonn forceps, Troutman forceps, suture needle      | 5        | 6          | 0    |
| Bonn forceps, suture needle                        | 1        | 4          | 0    |
| Bonn forceps, phacoemulsifier handpiece            | 5        | 0          | 13   |
| capsulorhexis forceps, micromanipulator            | 6        | 0          | 23   |
| Bonn forceps, needle holder, suture needle         | 3        | 2          | 2    |
| needle holder, suture needle                       | 5        | 0          | 1    |
| capsulorhexis forceps, Vannas scissors             | 7        | 9          | 0    |
| Bonn forceps, capsulorhexis forceps, suture needle | 0        | 0          | 3    |
| capsulorhexis cystotome, Bonn forceps              | 57       | 0          | 3    |
| Troutman forceps, micromanipulator                 | 2        | 0          | 0    |
| capsulorhexis forceps, suture needle               | 4        | 0          | 0    |

**Table 7** Number of frames for each instrument co-occurrence of the CaDIS dataset with the 19/3/3 split.

| Instrument combination                                                                    | Training | Validation | Test |
|-------------------------------------------------------------------------------------------|----------|------------|------|
| Bonn Forceps, Secondary Knife, Secondary Knife Handle                                     | 37       | 8          | 5    |
| Secondary Knife, Secondary Knife Handle                                                   | 69       | 4          | 10   |
| Bonn Forceps, Primary Knife                                                               | 113      | 9          | 30   |
| Capsulorhexis Cystotome, Capsulorhexis Cystotome Handle                                   | 60       | 11         | 13   |
| Phacoemulsifier Handpiece, Phacoemulsifier Handpiece Handle                               | 9        | 3          | 0    |
| Phacoemulsifier Handpiece, Micromanipulator, Phacoemulsifier Handpiece Handle             | 46       | 4          | 7    |
| Irrigation/Aspiration Handpiece, Irrigation/Aspiration Handpiece Handle                   | 56       | 7          | 21   |
| Lens Injector, Lens Injector Handle                                                       | 19       | 13         | 8    |
| Irrigation/Aspiration Handpiece, Micromanipulator, Irrigation/Aspiration Handpiece Handle | 10       | 0          | 6    |
| Irrigation/Aspiration Handpiece, Micromanipulator                                         | 48       | 29         | 10   |
| Rycroft Cannula, Rycroft Cannula Handle                                                   | 52       | 18         | 14   |
| Bonn Forceps, Secondary Knife                                                             | 75       | 10         | 20   |
| Phacoemulsifier Handpiece, Micromanipulator                                               | 239      | 42         | 44   |
| Primary Knife, Irrigation/Aspiration Handpiece, Micromanipulator                          | 0        | 0          | 1    |
| Bonn Forceps, Capsulorhexis Forceps                                                       | 12       | 0          | 9    |
| Irrigation/Aspiration Handpiece, Capsulorhexis Forceps                                    | 2        | 0          | 0    |
| Micromanipulator, Capsulorhexis Forceps                                                   | 3        | 0          | 0    |
| Bonn Forceps, Phacoemulsifier Handpiece                                                   | 1        | 0          | 2    |
| Bonn Forceps, Phacoemulsifier Handpiece, Phacoemulsifier Handpiece Handle                 | 2        | 0          | 0    |
| Hydrodissection Cannula, Micromanipulator                                                 | 1        | 0          | 0    |
| Capsulorhexis Cystotome, Bonn Forceps                                                     | 23       | 0          | 0    |
| Primary Knife, Lens Injector                                                              | 2        | 0          | 0    |
| Viscoelastic Cannula, Micromanipulator                                                    | 24       | 0          | 0    |
| Viscoelastic Cannula, Capsulorhexis Forceps                                               | 12       | 0          | 0    |

**Table 8** Number of frames for each instrument co-occurrence of the M2CAI-tool dataset with the 10/-/5 split.

| Instrument combination          | Training | Test |
|---------------------------------|----------|------|
| Grasper, Hook                   | 6279     | 3814 |
| Grasper, Clipper                | 275      | 177  |
| Grasper, Scissors               | 141      | 83   |
| Grasper, SpecimenBag            | 1140     | 373  |
| Grasper, Bipolar, SpecimenBag   | 17       | 47   |
| Grasper, Bipolar                | 351      | 193  |
| Grasper, Irrigator              | 409      | 63   |
| Grasper, Irrigator, SpecimenBag | 126      | 1    |
| Irrigator, SpecimenBag          | 26       | 1    |
| Grasper, Scissors, SpecimenBag  | 4        | 0    |
| Grasper, Scissors, Irrigator    | 2        | 0    |
| Bipolar, SpecimenBag            | 12       | 2    |
| Bipolar, Irrigator, SpecimenBag | 4        | 0    |
| Bipolar, Irrigator              | 1        | 28   |
| Grasper, Bipolar, Irrigator     | 0        | 8    |



### 3 Improved dataset splits

The following Tables 9, 10, 11, 12, 13, 14, 15 define improved dataset splits that are proposed as part of this work.

**Table 9** Improved 40/-/40 split of the Cholec80 dataset.

| Set      | File IDs                                                                                                                                                       |
|----------|----------------------------------------------------------------------------------------------------------------------------------------------------------------|
| Training | 1, 2, 3, 4, 5, 6, 7, 8, 9, 10, 11, 12, 13, 14, 15, 16, 17, 18, 19, 20, 21, 22, 23, 24, 25, 26, 27, 28, 30, 31, 34, 35, 36, 37, 39, 40, 58, 66, 71, 78          |
| Test     | 29, 32, 33, 38, 41, 42, 43, 44, 45, 46, 47, 48, 49, 50, 51, 52, 53, 54, 55, 56, 57, 59, 60, 61, 62, 63, 64, 65, 67, 68, 69, 70, 72, 73, 74, 75, 76, 77, 79, 80 |

**Table 10** Improved 32/8/40 split of the Cholec80 dataset.

| Set        | File IDs                                                                                                                                                       |
|------------|----------------------------------------------------------------------------------------------------------------------------------------------------------------|
| Training   | 1, 2, 3, 4, 5, 6, 7, 8, 9, 10, 11, 12, 13, 15, 16, 17, 18, 19, 20, 21, 22, 24, 25, 26, 27, 28, 30, 31, 37, 41, 57, 60                                          |
| Validation | 14, 33, 34, 35, 36, 38, 39, 40                                                                                                                                 |
| Test       | 23, 29, 32, 42, 43, 44, 45, 46, 47, 48, 49, 50, 51, 52, 53, 54, 55, 56, 58, 59, 61, 62, 63, 64, 65, 66, 67, 68, 69, 70, 71, 72, 73, 74, 75, 76, 77, 78, 79, 80 |

**Table 11** Improved 40/8/32 split of the Cholec80 dataset.

| Set        | File IDs                                                                                                                                              |
|------------|-------------------------------------------------------------------------------------------------------------------------------------------------------|
| Training   | 1, 2, 3, 4, 5, 6, 7, 8, 9, 10, 11, 12, 13, 15, 16, 17, 18, 19, 20, 21, 22, 24, 25, 26, 27, 28, 30, 31, 34, 35, 36, 37, 39, 40, 43, 46, 47, 48, 60, 70 |
| Validation | 14, 33, 38, 41, 42, 44, 45, 57                                                                                                                        |
| Test       | 23, 29, 32, 49, 50, 51, 52, 53, 54, 55, 56, 58, 59, 61, 62, 63, 64, 65, 66, 67, 68, 69, 71, 72, 73, 74, 75, 76, 77, 78, 79, 80                        |

**Table 12** Improved 25/5/20 split of the CATARACTS dataset.

| Set        | File IDs                                                                                           |
|------------|----------------------------------------------------------------------------------------------------|
| Training   | 14, 26, 27, 28, 29, 30, 31, 32, 33, 34, 36, 37, 38, 39, 40, 41, 42, 43, 44, 45, 46, 47, 48, 49, 50 |
| Validation | 1, 7, 16, 19, 35                                                                                   |
| Test       | 2, 3, 4, 5, 6, 8, 9, 10, 11, 12, 13, 15, 17, 18, 20, 21, 22, 23, 24, 25                            |

**Table 13** Improved 19/3/3 split of the CaDIS dataset.

| Set        | File IDs                                                           |
|------------|--------------------------------------------------------------------|
| Training   | 1, 2, 3, 4, 6, 7, 8, 9, 10, 11, 13, 14, 15, 17, 18, 20, 23, 24, 25 |
| Validation | 5, 16, 19                                                          |
| Test       | 12, 21, 22                                                         |

**Table 14** Improved 27/-/14 split of the M2CAI-workflow dataset.

| Set      | File IDs                                                                                                                                                                                                                                |
|----------|-----------------------------------------------------------------------------------------------------------------------------------------------------------------------------------------------------------------------------------------|
| Training | train1, train2, train3, train4, train5, train6, train7, train8, train9, train11, train12, train13, train14, train15, train16, train17, train18, train19, train20, train21, train22, train23, train24, train25, train26, train27, test11 |
| Test     | train10, test1, test2, test3, test4, test5, test6, test7, test8, test9, test10, test12, test13, test14                                                                                                                                  |

**Table 15** Improved 10/-/5 split of the M2CAI-tool dataset.

| Set      | File IDs                       |
|----------|--------------------------------|
| Training | 1, 2, 3, 4, 5, 7, 8, 9, 10, 14 |
| Test     | 6, 11, 12, 13, 15              |
